# Supplementary material for: Efficacy of an improved method to screen semiochemicals of insect
Source: PeerJ. 2021 May 20;9:e11510. doi: 10.7717/peerj.11510 (PMC8141285; doi:10.7717/peerj.11510)
Supplement: Supplemental Information 1 [file peerj-09-11510-s001.xlsx]

## Sheet: Sheet1
Method	Compound	Retention time (min)
GC-EAG-MS	Cis-3-hexen-1-ol	5.82
	Myrcene	8.06
	Linalool	9.87
	Methyl salicylate	11.37
	Trans-β-caryophyllene	14.64
GC-EAD	Cis-3-hexen-1-ol	5.32
	Myrcene	7.34
	Linalool	9.03
	Methyl salicylate	10.54
	Trans-β-caryophyllene	13.68
